# Supplementary material for: Mapping Topoisomerase IV Binding and Activity Sites on the E. coli Genome
Source: PubMed Central journal article supplement (PMC4865107; doi:10.1371/journal.pgen.1006025), 2016-05-12
Supplement: pgen.1006025.s003.pdf [file pgen.1006025.s003.pdf]

A

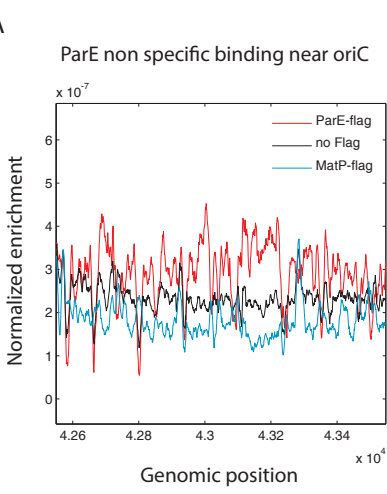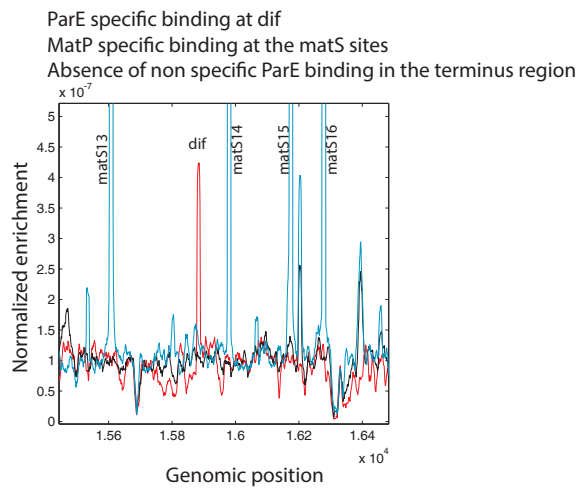

B

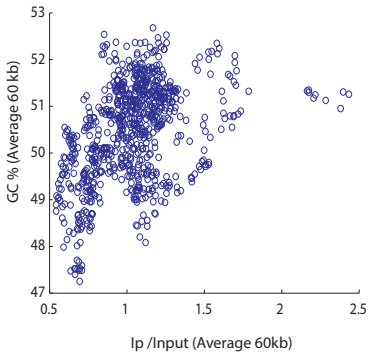

C

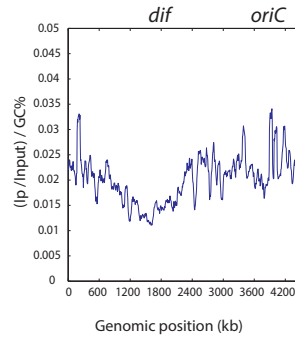

D

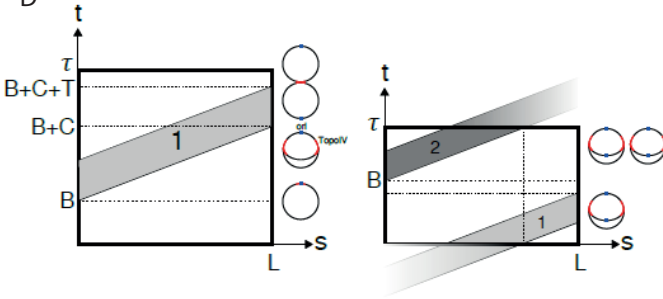

E

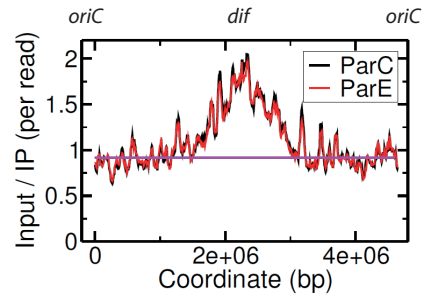

Supplementary Figure S3
